# Supplementary material for: Ni-Based SBA-15 Catalysts Modified with CeMnOx for CO2 Valorization via Dry Reforming of Methane: Effect of Composition on Modulating Activity and H2/CO Ratio
Source: MDPI journal article supplement (doi:10.3390/nano13192641), 2023-09-26
Supplement: s1 [file s1]

Supporting information

# Ni-Based SBA-15 Catalysts Modified with CeMnO<sub>x</sub> for CO<sub>2</sub> Valorization via Dry Reforming of Methane: Effect of Composition on Modulating Activity and H<sub>2</sub>/CO Ratio

Maria V. Grabchenko <sup>1</sup>, Natalia V. Dorofeeva <sup>1</sup>, Valery A. Svetlichnyi <sup>2</sup>, Yurii V. Larichev <sup>3</sup>, Valeria La Parola <sup>4</sup>, Leonarda Francesca Liotta <sup>4,\*</sup>, Sergei A. Kulinich <sup>5,\*</sup> and Olga V. Vodyankina <sup>1</sup>

<sup>1</sup> Laboratory of Catalytic Research, Tomsk State University, 634050 Tomsk, Russia; marygra@mail.ru (M.V.G.); natalia10@mail.ru (N.V.D.); vodyankina\_o@mail.ru (O.V.V.)

<sup>2</sup> Laboratory of Advanced Materials and Technology, Siberian Physical Technical Institute, Tomsk State University, 634050 Tomsk, Russia; v\_svetlichnyi@bk.ru (V.A.S.)

<sup>3</sup> Boreskov Institute of Catalysis SB RAS (BIC SB RAS), 630090 Novosibirsk, Russia; ylarichev@gmail.com

<sup>4</sup> Institute for the Study of Nanostructured Materials (ISMN), National Research Council (CNR), 90146 Palermo, Italy; valeria.laparola@cnr.it

<sup>5</sup> Research Institute of Science & Technology, Tokai University, Hiratsuka, Kanagawa 259-1292, Japan

\* Correspondence: leonardafrancesca.liotta@cnr.it (L.F.L.); skulinich@tokai-u.jp (S.A.K.)

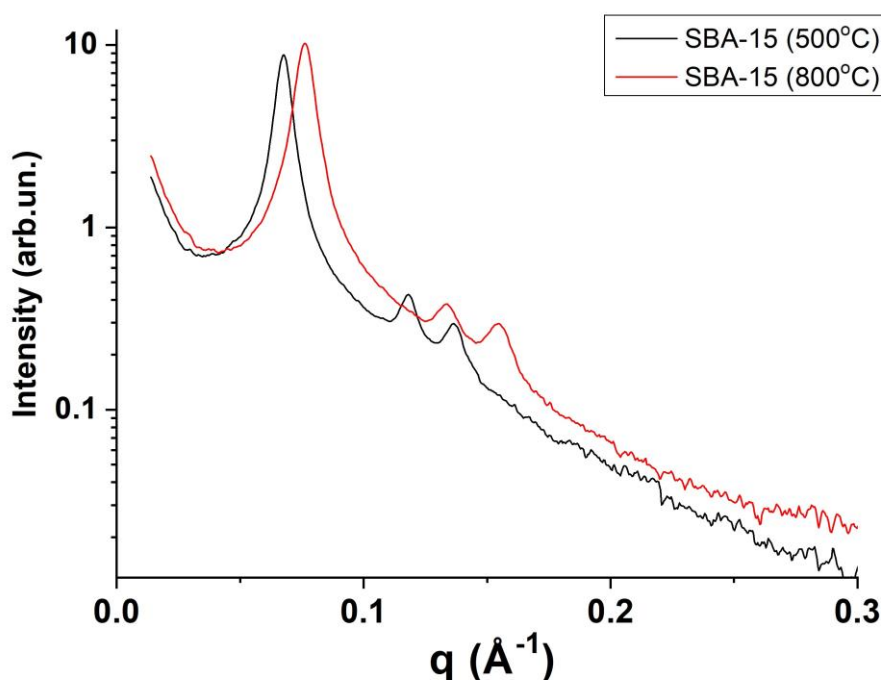

**Figure S1.** SAXS patterns for SBA-15, calcined at 500 and 800 °C.

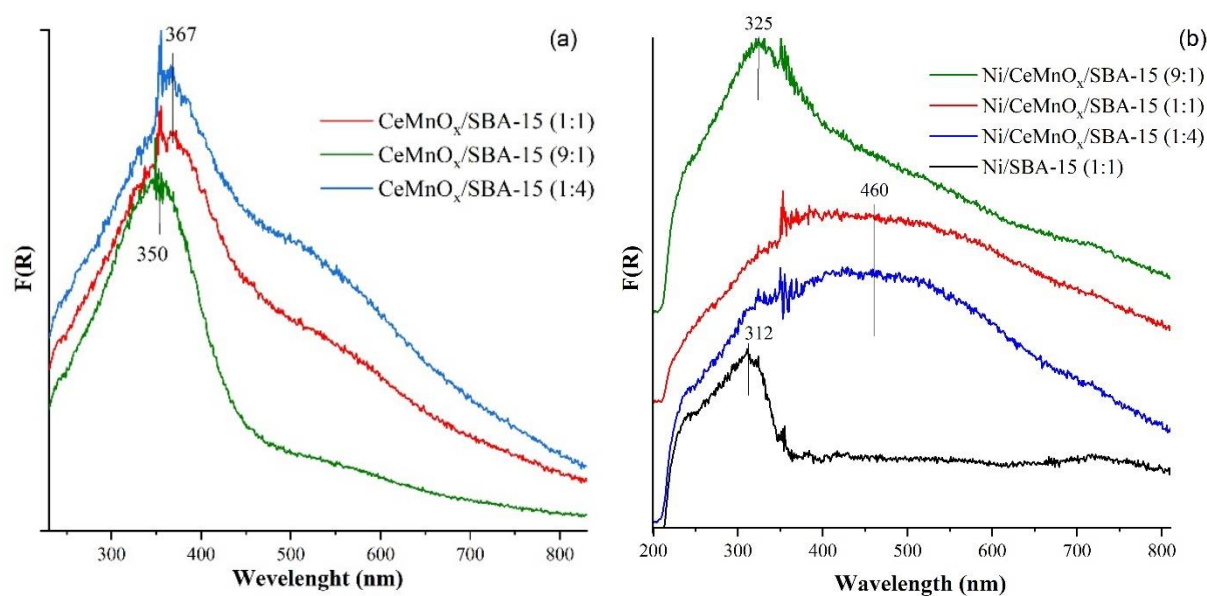

**Figure S2.** UV-vis diffuse reflectance spectra for CeMnO<sub>x</sub>/SBA-15 with different Ce/Mn molar ratios (a) and the corresponding Ni/CeMnO<sub>x</sub>/SBA-15 catalysts (b).

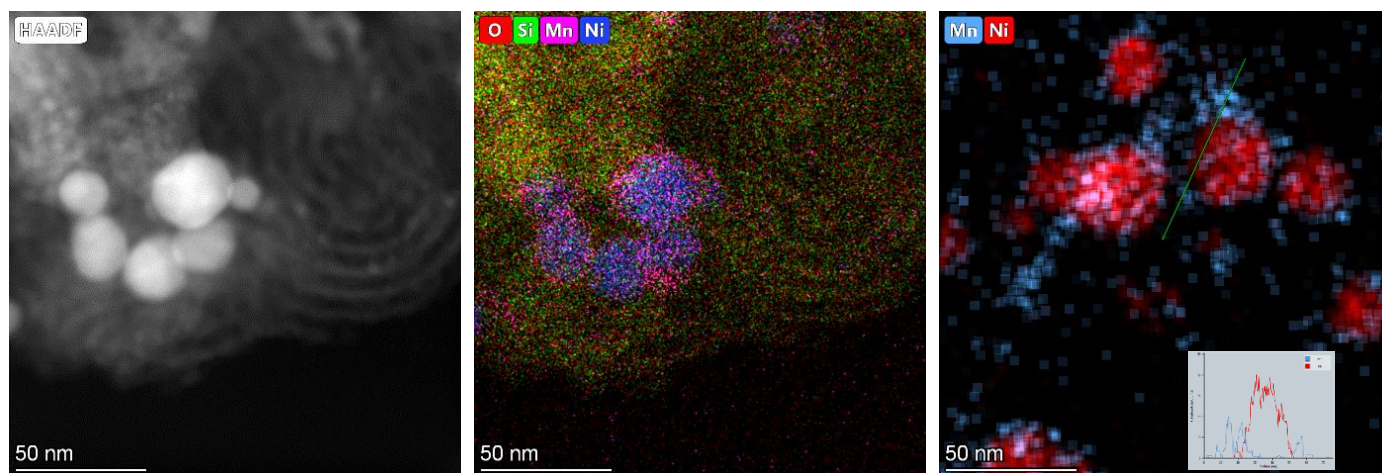

**Figure S3.** HR TEM of Ni/CeMnO<sub>x</sub>/SBA-15 (1:4) catalyst reduced at 700 °C

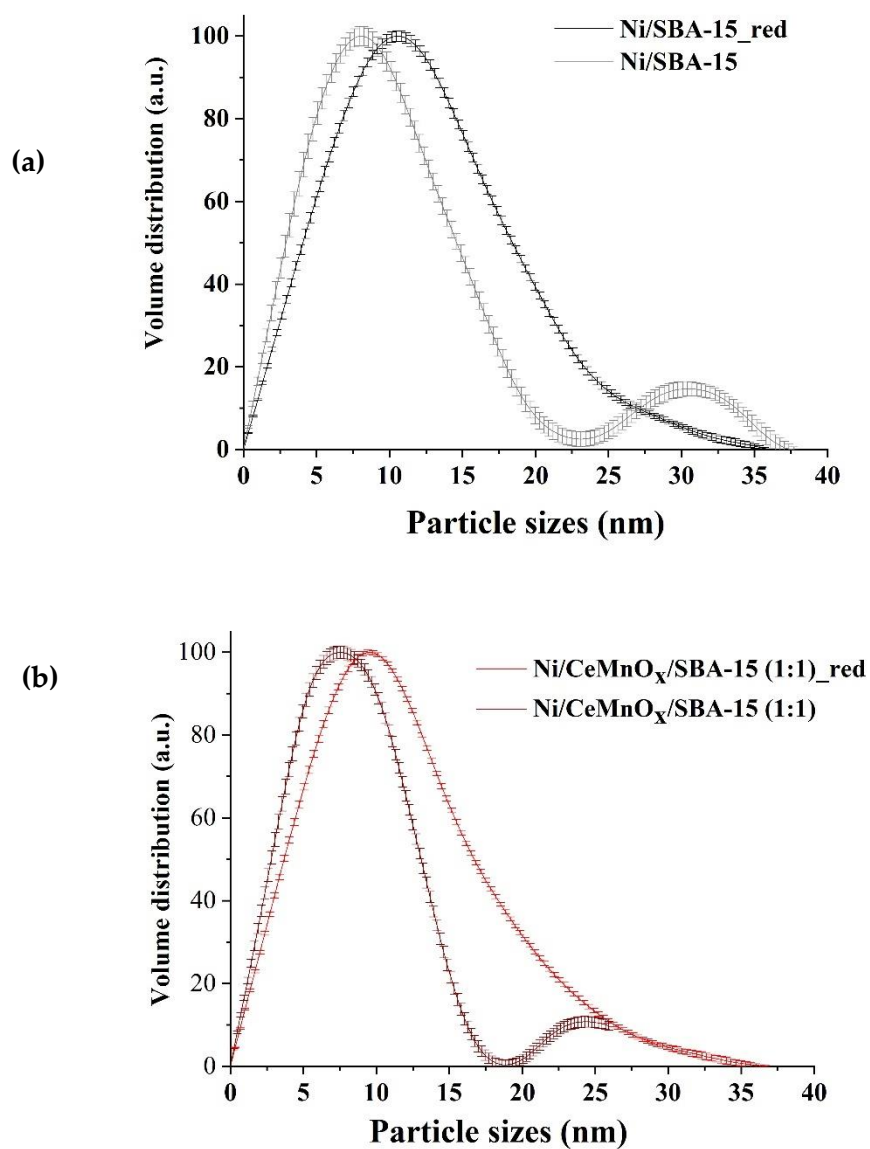

**Figure S4.** Particle size distribution of calcined and reduced Ni catalysts (a) Ni/SBA-15, (b) Ni/CeMnO<sub>x</sub>/SBA-15 (1:1) based on SAXS data.

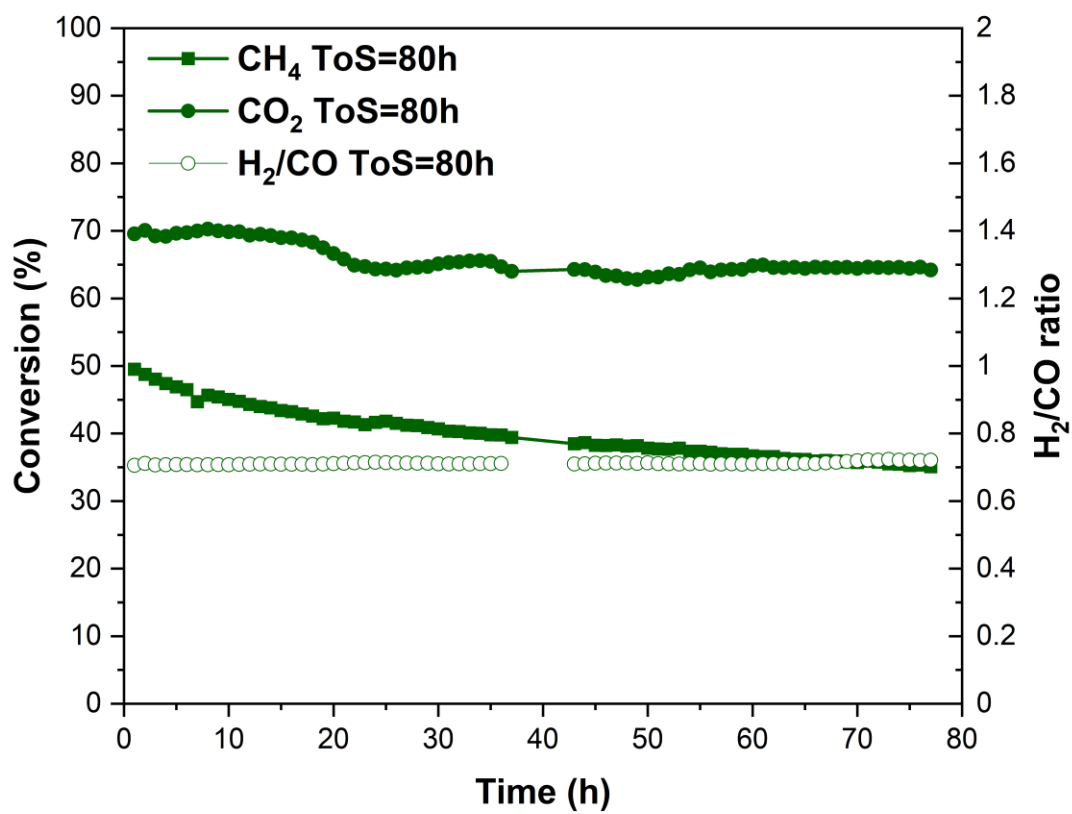

**Figure S5.** Long-run DRM tests on Ni/CeMnO<sub>x</sub>/SBA-15 (9:1) at 650 °C during 80 h time on stream (ToS).

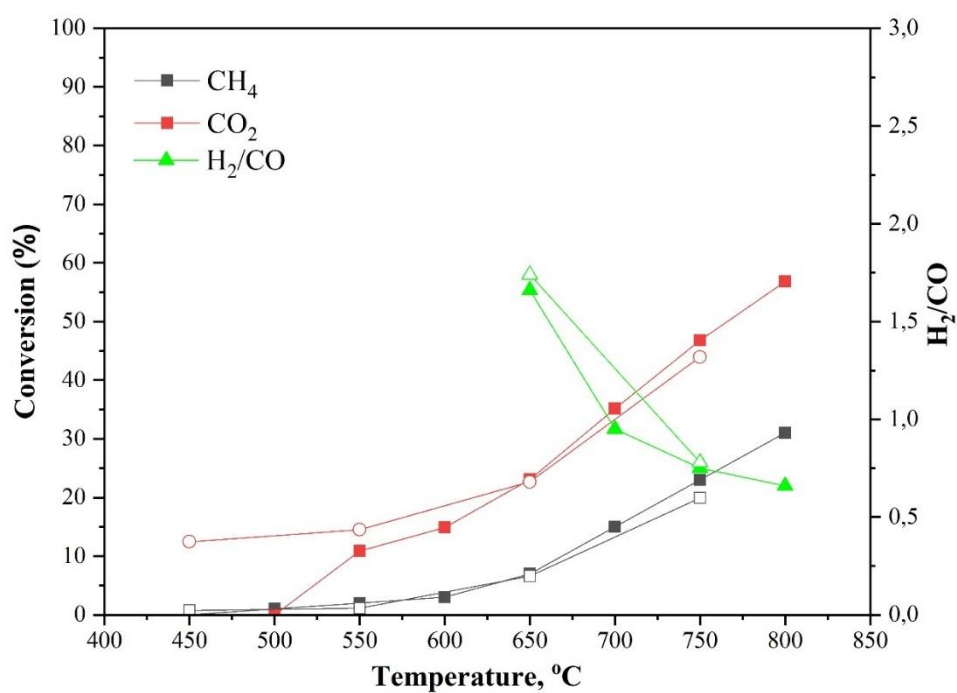

**Figure S6.** Temperature dependences of CH<sub>4</sub> and CO<sub>2</sub> conversions and H<sub>2</sub>/CO ratio for Ni/LaMnO<sub>x</sub>/SBA-15 (1:1) catalyst. Filled symbols – heating, empty symbols – cooling.

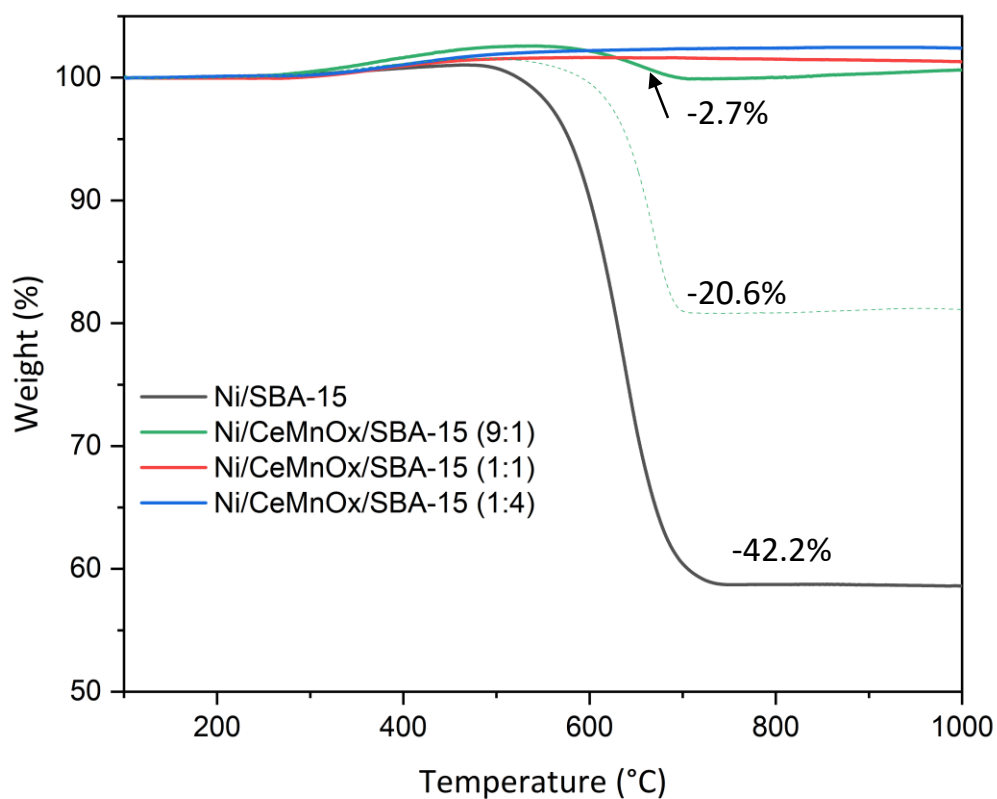

**Figure S7.** TGA for samples after 24 h of time-on-stream. Black, blue, red, and green colors correspond to Ni/SBA-15, Ni/CeMnO<sub>x</sub>/SBA-15 (1:4), Ni/CeMnO<sub>x</sub>/SBA-15(1:1), Ni/CeMnO<sub>x</sub>/SBA-15 (9:1). The green dashed line refers to the long-run on Ni/CeMnO<sub>x</sub>/SBA-15 (9:1) at 650 °C during 80 h.
